# Supplementary material for: 2,6-Bis(5,6-diisopropyl-1,2,4-triazin-3-yl)pyridine: a highly selective N-donor ligand studied by TRLFS, liquid–liquid extraction and molecular dynamics
Source: Royal Society of Chemistry journal article supplement (doi:10.1039/c6nj02657e), 2016-01-01
Supplement: c6nj02657e1.pdf [file c6nj02657e1.pdf]

SUPPORTING INFORMATION FOR

## 2,6-bis(1,2,4-triazine-5,6-diisopropyl-3-yl)pyridine: A highly selective N-donor ligand studied by TRLFS, liquid-liquid extraction and molecular dynamics

*Björn B. Beele,<sup>\*1,2</sup> Andrej Skerencak-Frech,<sup>\*1,2</sup> Arnulf Stein,<sup>1</sup> Michael Trumm,<sup>2</sup> Andreas Wilden,<sup>3</sup> Steve Lange,<sup>3</sup> Giuseppe Modolo,<sup>3</sup> Udo Müllich,<sup>2</sup> Bernd Schimmelpfennig,<sup>2</sup> Andreas Geist<sup>2</sup> and Petra J. Panak<sup>1,2</sup>*

<sup>1</sup> Heidelberg University, Institut für Physikalische Chemie (PCI), Im Neuenheimer Feld 253, 69120 Heidelberg, Germany.

<sup>2</sup> Karlsruher Institute of Technology (KIT), Institut für Nukleare Entsorgung (INE), P.O. Box 3640, 76021 Karlsruhe, Germany.

<sup>3</sup> Forschungszentrum Jülich GmbH (FZJ), Institut für Energie- und Klimaforschung, Nukleare Entsorgung und Reaktorsicherheit (IEK-6), 52425 Jülich, Germany.

## TRLFS setup

TRLFS measurements are performed using a Nd:YAG-pumped dye laser system [Surelite II laser (Continuum), NarrowScan D-R dye laser (Radiant Dyes Laser Accessories)]. For Eu(III) excitation a wavelength of 394.0 nm and for Cm(III) a wavelength of 396.6 nm was used. The fluorescence emission is recorded at an angle of 90° to the exciting laser beam. A Shamrock 303i spectrograph (ANDOR), equipped with a 300, 900 and 1200 lines/mm grating turret is used for spectral decomposition. The fluorescence emission is detected by an ICCD camera [iStar Gen III, A-DH 720 18F-63 (ANDOR)]. Rayleigh scattering and short-lived fluorescence of organic ligands are discriminated by a delay time of 1.0  $\mu$ s before the fluorescence is recorded. The quartz cuvette is temperature controlled at T = 25 °C. Titrations are performed by stepwise addition of a <sup>i</sup>Pr-BTP solution in MeOH:H<sub>2</sub>O 1:1 (vol.) to a Cm(III) and Eu(III) solution, respectively, in the same solvent mixture. The solutions are allowed to equilibrate for 10 minutes before the fluorescence spectrum is recorded.

## Selected Cm(III) and Eu(III) emission spectra

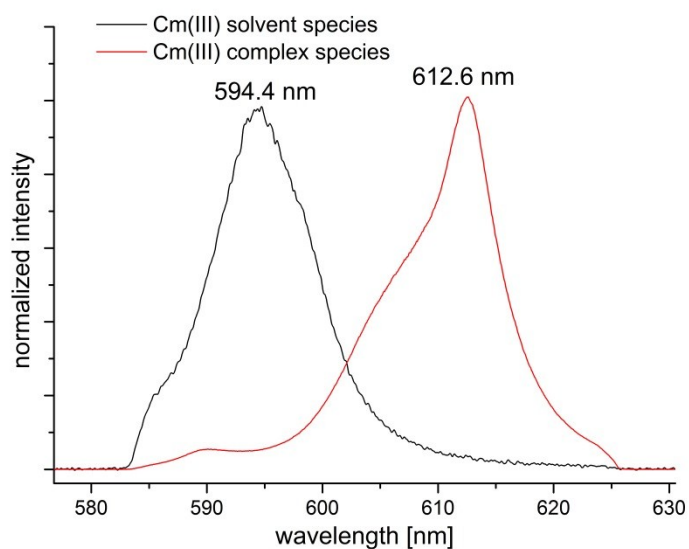

**Figure S1** Emission spectra of the solvated Cm(III) ion and the Cm(III)-*i*Pr-BTP complex species in MeOH:H<sub>2</sub>O 1:1 (vol.).

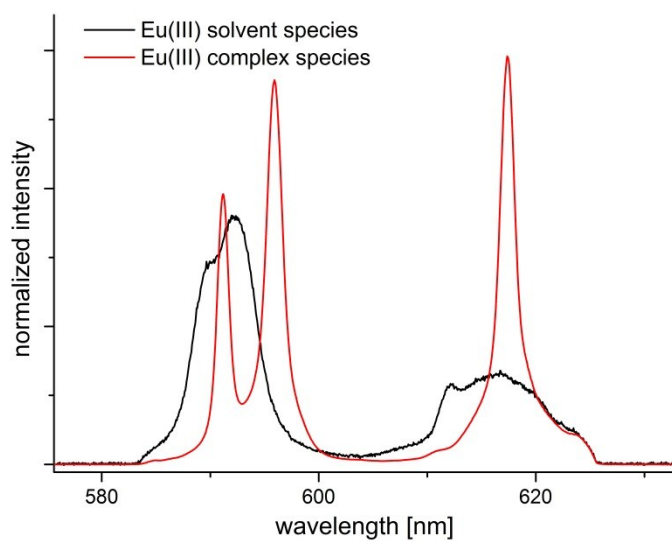

**Figure S2** Eu(III) emission spectra resulting from the  ${}^5D_0 \rightarrow {}^7F_{1/2}$  transition of the solvated Eu(III) ion and the Eu(III)-*i*Pr-BTP complex species in MeOH:H<sub>2</sub>O 1:1 (vol.).

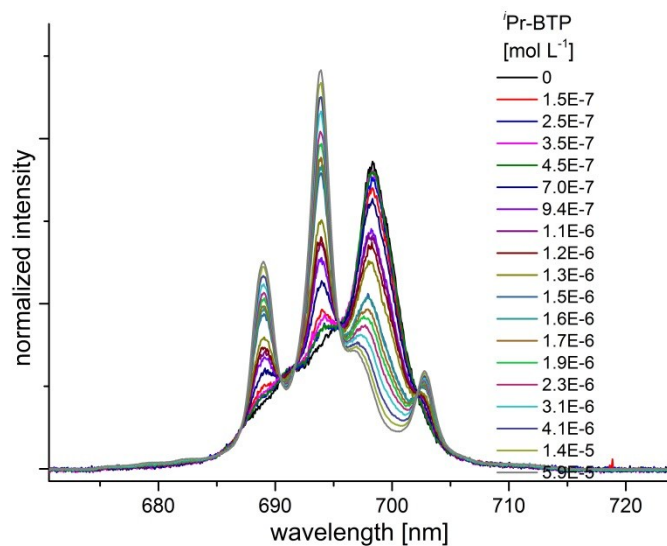

**Figure S3** Eu(III) emission spectra resulting from the  $^5D_0 \rightarrow ^7F_4$  transition as a function of the ligand concentration in MeOH:H<sub>2</sub>O 1:1 (vol.);  $[Eu(III)]_{ini} = 1.0 \cdot 10^{-5} \text{ mol} \cdot \text{L}^{-1}$ .

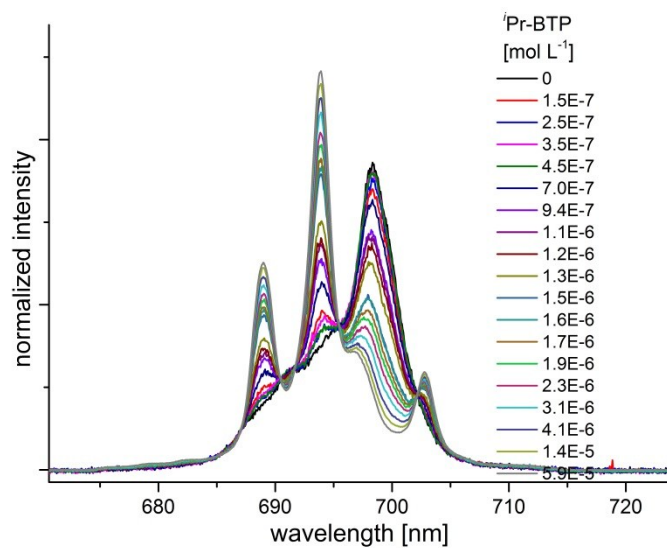

**Figure S4** Eu(III) emission spectra resulting from the  $^5D_0 \rightarrow ^7F_4$  transition of the solvated Eu(III) ion and the Eu(III)-*i*Pr-BTP complex species in MeOH:H<sub>2</sub>O 1:1 (vol.).

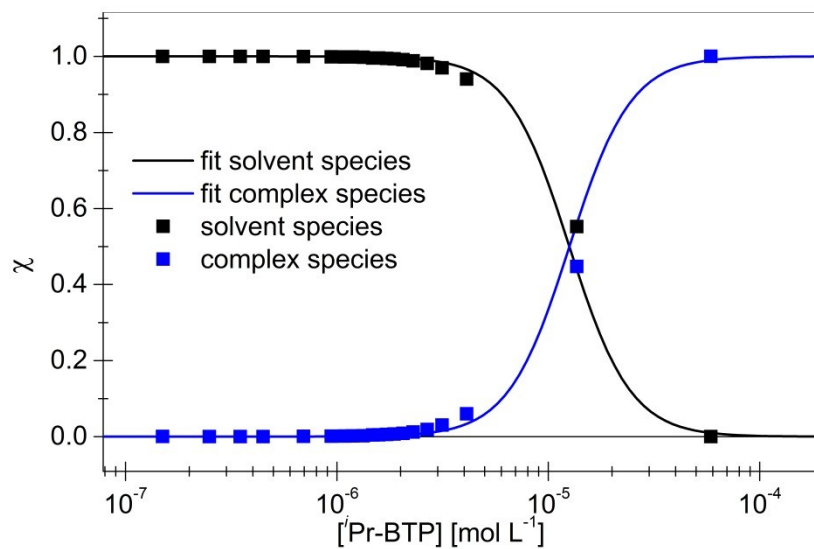

**Figure S5** Species distribution of the Eu(III) complex species in MeOH:H<sub>2</sub>O 1:1 (vol.) determined from deconvolution of the  $^5D_0 \rightarrow ^7F_4$  bands;  $[Eu(III)]_{ini} = 1 \cdot 10^{-5} \text{ mol} \cdot \text{L}^{-1}$ ; lines calculated with  $\log \beta_3 = 14.9$ .

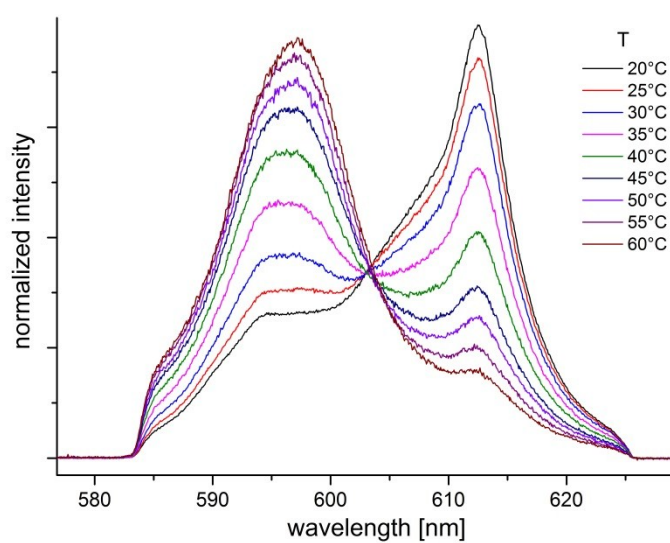

**Figure S6** Normalized Cm(III) emission spectra as a function of the temperature in MeOH:H<sub>2</sub>O 1:1 (vol.);  $[Cm(III)] = 1 \cdot 10^{-7} \text{ mol} \cdot \text{L}^{-1}$ ,  $[Pr-BTP] = 1.2 \cdot 10^{-6} \text{ mol} \cdot \text{L}^{-1}$ .

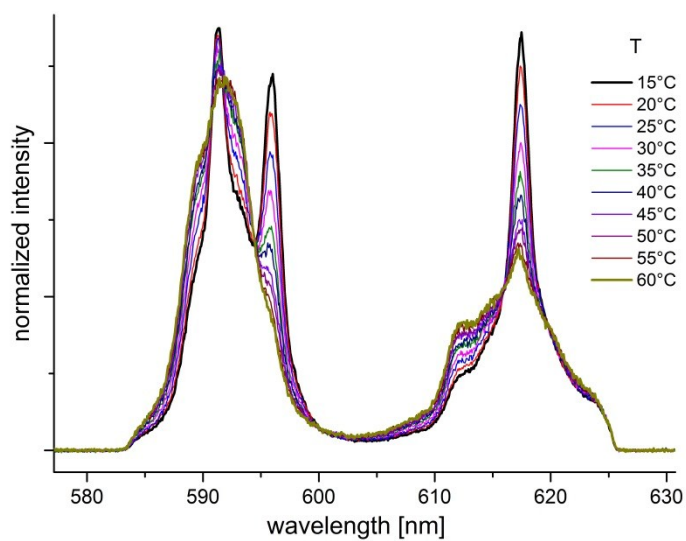

**Figure S7** Normalized  ${}^5D_0 \rightarrow {}^7F_{1/2}$  emission spectra of Eu(III) as a function of the temperature in MeOH:H<sub>2</sub>O 1:1 (vol.); [Eu(III)] =  $1.0 \cdot 10^{-5}$  mol·L<sup>-1</sup>, [iPr-BTP] =  $1.2 \cdot 10^{-6}$  mol·L<sup>-1</sup>.

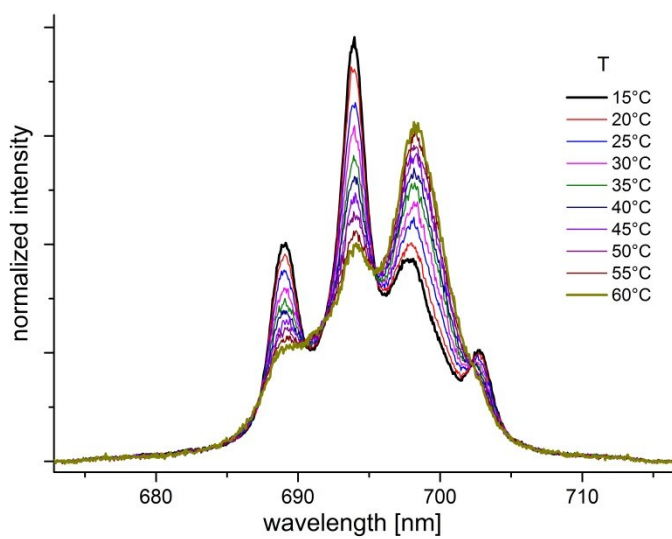

**Figure S8** Normalized  ${}^5D_0 \rightarrow {}^7F_4$  emission spectra of Eu(III) as a function of the temperature in MeOH:H<sub>2</sub>O 1:1 (vol.); [Eu(III)] =  $1.0 \cdot 10^{-5}$  mol·L<sup>-1</sup>, [iPr-BTP] =  $1.2 \cdot 10^{-6}$  mol·L<sup>-1</sup>.

## ICP-MS analysis

Solvent extraction experiments were carried out using the kerosene:1-octanol = 7:3 diluent mixture and aqueous phases containing Ln(III) + Y(III) total concentrations of 0.25 and 2.5 g L<sup>-1</sup>, spiked with <sup>241</sup>Am and <sup>152</sup>Eu. The phases were contacted for different contacting times and separated by centrifugation. The phases are separated from the precipitate by centrifugation and sampled for ICP-MS, gamma, and LSC analysis. Distribution ratios were calculated as  $D = [M(III)_{org}]/[M(III)_{aq}]$  for each metal ion measured. The distribution ratios of <sup>241</sup>Am and <sup>152</sup>Eu obtained from gamma and LSC counting and ICP-MS were in good agreement. The mass balances were calculated according to the following equation:

$$\text{Mass balance} = ([M(III)_{org}] + [M(III)_{aq}]) \cdot 100\% / [M(III)_{ini}]$$

The expected mass balance for the total recovery is 100%. Deviations < 100% give a lacking of mass, e.g. by the formation of precipitates. The so determined distribution ratios are given in table S1 and S2.

**Table S1** Distribution ratios and mass balances as a function of mixing time using 10 mmol·L<sup>-1</sup> iPr-BTP in kerosene:1-octanol (7:3 vol.). <sup>241</sup>Am(III) + <sup>152</sup>Eu(III) (spike concentrations) + 0.25 g·L<sup>-1</sup> Ln(III) in 1.0 mol·L<sup>-1</sup> HNO<sub>3</sub>.

| t(min) | Distribution ratio |       |       |       |       |       | Mass balance [%] |      |       |       |      |      |
|--------|--------------------|-------|-------|-------|-------|-------|------------------|------|-------|-------|------|------|
|        | 2                  | 5     | 10    | 20    | 50    | 100   | 2                | 5    | 10    | 20    | 50   | 100  |
| Y      | 0.01               | <0.01 | <0.01 | 0.01  | <0.01 | <0.01 | 96.5             | 97.7 | 101.4 | 101.1 | 96.7 | 95.2 |
| La     | <0.01              | <0.01 | <0.01 | <0.01 | <0.01 | <0.01 | 95.2             | 94.8 | 97.6  | 97.2  | 97.2 | 96.2 |
| Ce     | 0.02               | 0.01  | <0.01 | <0.01 | <0.01 | <0.01 | 97.2             | 97.0 | 99.2  | 99.1  | 97.5 | 99.3 |
| Pr     | 0.01               | 0.01  | 0.01  | 0.01  | 0.01  | <0.01 | 96.1             | 97.7 | 101.4 | 99.7  | 96.7 | 96.1 |
| Nd     | 0.01               | 0.02  | 0.04  | 0.03  | 0.02  | 0.01  | 96.7             | 98.2 | 101.9 | 97.0  | 91.4 | 88.0 |
| Sm     | 0.01               | 0.04  | 0.09  | 0.12  | 0.05  | 0.03  | 95.0             | 97.0 | 101.1 | 87.9  | 72.3 | 66.2 |
| Eu     | 0.01               | 0.04  | 0.09  | 0.13  | 0.06  | 0.04  | 94.0             | 96.3 | 102.0 | 85.8  | 70.2 | 63.5 |
| Gd     | 0.01               | 0.03  | 0.07  | 0.09  | 0.05  | 0.03  | 94.0             | 97.2 | 99.8  | 88.9  | 76.5 | 68.2 |
| Tb     | 0.02               | 0.04  | 0.10  | 0.14  | 0.08  | 0.05  | 94.0             | 96.0 | 99.6  | 85.0  | 66.8 | 56.4 |
| Dy     | 0.01               | 0.04  | 0.09  | 0.12  | 0.08  | 0.05  | 94.6             | 96.9 | 100.5 | 86.8  | 68.9 | 56.6 |
| Ho     | 0.01               | 0.03  | 0.08  | 0.10  | 0.07  | 0.05  | 93.9             | 95.3 | 99.2  | 88.2  | 73.6 | 61.2 |
| Er     | 0.01               | 0.03  | 0.06  | 0.07  | 0.06  | 0.04  | 95.0             | 95.1 | 98.7  | 89.7  | 77.2 | 66.4 |
| Tm     | 0.01               | 0.02  | 0.04  | 0.05  | 0.05  | 0.03  | 93.8             | 94.8 | 98.4  | 93.4  | 82.5 | 72.0 |
| Yb     | 0.01               | 0.02  | 0.03  | 0.04  | 0.03  | 0.02  | 93.1             | 93.8 | 96.9  | 92.5  | 87.2 | 80.0 |
| Lu     | 0.01               | 0.01  | 0.02  | 0.02  | 0.02  | 0.02  | 93.9             | 94.1 | 98.0  | 94.9  | 90.5 | 87.4 |
| Am     | 0.63               | 2.11  | 9.97  | 53.7  | 20.3  | 7.89  | 100              | 98.4 | 94.1  | 39.2  | 3.7  | 1.6  |

**Table S2** Distribution ratios and mass balances as a function of mixing time using 10 mmol·L<sup>-1</sup> Pr-BTP in kerosene:1-octanol (7:3 vol.). <sup>241</sup>Am(III) + <sup>152</sup>Eu(III) (spike concentrations) + 2.5 g·L<sup>-1</sup> Ln(III) in 1.3 mol·L<sup>-1</sup> HNO<sub>3</sub>.

| t(min) | Distribution ratio |       |       |       |       |       | Mass balance [%] |       |       |      |      |      |
|--------|--------------------|-------|-------|-------|-------|-------|------------------|-------|-------|------|------|------|
|        | 2                  | 5     | 10    | 20    | 50    | 100   | 2                | 5     | 10    | 20   | 50   | 100  |
| Y      | <0.01              | <0.01 | <0.01 | <0.01 | <0.01 | <0.01 | 96.2             | 93.5  | 98.0  | 96.4 | 98.1 | 95.7 |
| La     | <0.01              | <0.01 | <0.01 | <0.01 | <0.01 | <0.01 | 95.6             | 94.2  | 97.1  | 95.4 | 97.1 | 97.5 |
| Ce     | <0.01              | <0.01 | <0.01 | <0.01 | <0.01 | <0.01 | 95.4             | 93.9  | 96.3  | 94.6 | 96.4 | 96.2 |
| Pr     | 0.01               | <0.01 | <0.01 | <0.01 | <0.01 | <0.01 | 95.7             | 93.9  | 96.8  | 93.2 | 94.9 | 92.2 |
| Nd     | 0.01               | 0.01  | <0.01 | <0.01 | <0.01 | <0.01 | 95.4             | 92.6  | 94.8  | 92.2 | 90.2 | 86.9 |
| Sm     | 0.02               | 0.01  | <0.01 | <0.01 | <0.01 | <0.01 | 96.1             | 92.0  | 93.6  | 89.7 | 86.7 | 83.8 |
| Eu     | 0.02               | 0.01  | 0.01  | <0.01 | <0.01 | <0.01 | 95.8             | 91.1  | 92.1  | 88.5 | 86.5 | 82.1 |
| Gd     | 0.02               | 0.01  | <0.01 | <0.01 | <0.01 | <0.01 | 95.1             | 92.4  | 94.3  | 90.4 | 88.8 | 85.4 |
| Tb     | 0.02               | 0.01  | 0.01  | 0.01  | <0.01 | <0.01 | 94.9             | 90.8  | 91.1  | 86.9 | 82.2 | 77.0 |
| Dy     | 0.02               | 0.01  | 0.01  | 0.01  | <0.01 | <0.01 | 95.3             | 92.0  | 91.8  | 88.3 | 83.3 | 77.4 |
| Ho     | 0.02               | 0.01  | 0.01  | 0.01  | <0.01 | <0.01 | 95.5             | 92.9  | 92.6  | 88.5 | 83.6 | 78.6 |
| Er     | 0.01               | 0.01  | 0.01  | 0.01  | 0.01  | <0.01 | 96.8             | 94.9  | 93.7  | 91.1 | 86.6 | 83.0 |
| Tm     | 0.01               | 0.01  | 0.01  | 0.01  | <0.01 | <0.01 | 95.3             | 92.2  | 94.7  | 90.1 | 88.0 | 83.9 |
| Yb     | 0.01               | 0.01  | 0.01  | 0.01  | <0.01 | <0.01 | 97.3             | 96.1  | 96.7  | 94.5 | 93.6 | 90.7 |
| Lu     | 0.01               | 0.01  | 0.01  | 0.01  | <0.01 | <0.01 | 96.2             | 96.1  | 95.5  | 93.6 | 94.1 | 92.3 |
| Am     | 0.87               | 0.54  | 0.36  | 0.19  | 0.00  | 0.58  | 100              | 27.74 | 18.40 | 4.83 | 0.71 | 0.72 |
